# Supplementary material for: Flip-flop asymmetry of cholesterol in model membranes induced by thermal gradients
Source: Royal Society of Chemistry journal article supplement (doi:10.1039/d0sm00546k), 2020-01-01
Supplement: d0sm00546k1.pdf [file d0sm00546k1.pdf]

## Supplementary Information for Flip-flop asymmetry of cholesterol in model membranes induced by thermal gradients

### Assignment of cholesterol to a membrane leaflet

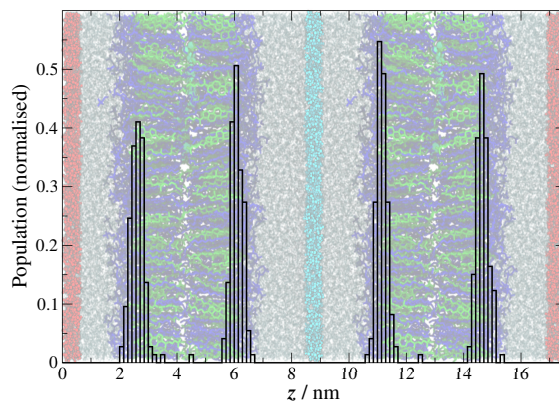

Figure 1: Histogram of the  $z$  coordinates of the cholesterol oxygen atoms, used to assign cholesterol molecules to a particular leaflet. The specific data shown are for the final configuration of a 50 ns simulation at the highest temperature gradient (TG3). The graph is overlaid over a snapshot from the simulation, coloured as in figure 1 in the main paper.
